# Supplementary material for: Frequent loss of endothelin-3 (EDN3) expression due to epigenetic inactivation in human breast cancer
Source: PubMed Central journal article supplement (PMC2716502; doi:10.1186/bcr2319), 2009-06-15
Supplement: bcr2319-S1.pdf [file bcr2319-S1.pdf]

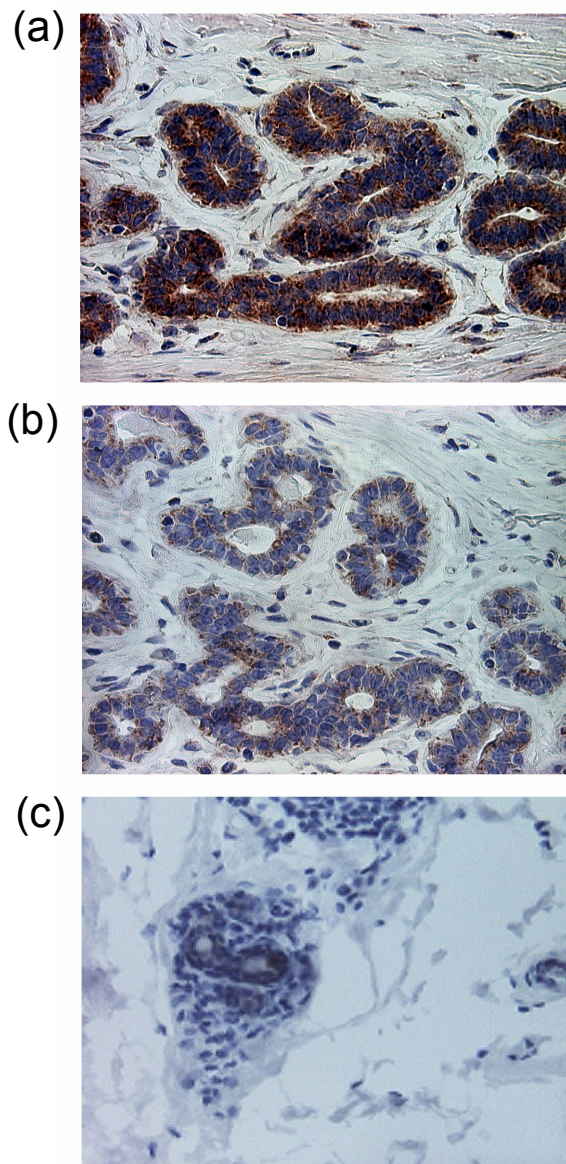

**Additional data file 1: Specificity of the applied EDN3 antibody.** (a) Normal breast tissue stained with the antibody as indicated in the Materials and Methods section. (b) The prior incubation of the antibody with the respective blocking peptide (Santa Cruz Biotechnology Inc., sc-21628 P) for 2 hours strongly reduces staining intensity. (c) Normal breast tissue as negative control, in which the primary antibody has been omitted. Magnifications: 200x.
